# Supplementary material
Source: PubMed Central journal article supplement (PMC8767980)
Supplement: ehp8083.s001.acco.pdf [file ehp8083.s001.acco.pdf]

**Note to readers with disabilities:** *EHP* strives to ensure that all journal content is accessible to all readers. However, some figures and Supplemental Material published in *EHP* articles may not conform to [508 standards](#) due to the complexity of the information being presented. If you need assistance accessing journal content, please contact [ehp508@niehs.nih.gov](mailto:ehp508@niehs.nih.gov). Our staff will work with you to assess and meet your accessibility needs within 3 working days.

## **Supplemental Material**

### **Warm Season and Emergency Department Visits to U.S. Children's Hospitals**

Aaron S. Bernstein, Shengzhi Sun, Kate R. Weinberger, Keith R. Spangler, Perry E. Sheffield, and Gregory A. Wellenius

#### **Table of Contents**

**Figure S1.** Children's Estimated exposure-response functions and 95% confidence intervals of the association between daily maximum temperature and relative risk of emergency department visits for all causes and specific causes, summed over all lags (0-7 days), and fitted using a quadratic B-spline with 3 degrees of freedom. The temperature-ED visit association was modeled with a quasi-Poisson regression with distributed lag nonlinear model for each hospital, controlling for temporal trends, seasonality, relative humidity, federal holidays, and day of the week. Relative risks were then pooled across the 47 participating hospitals using multivariate random-effect meta-analyses with hospital-specific mean and range of temperatures as the predictors. The mean minimum morbidity daily maximum temperature across the 47 children's hospitals was the reference temperature.

**Figure S2.** Estimated exposure-response functions and 95% confidence intervals as in Figure S1 but fitted with a natural cubic spline with 3 degrees of freedom for ambient temperature.

**Figure S3.** Estimated lag-response functions and 95% confidence intervals depicting the time course of the association between daily maximum temperature at the 95th percentile and relative risk of emergency department visits for all causes and specific causes, May through September of 2016-2018. The temperature-ED visit association was modeled with a quasi-Poisson regression with a distributed lag nonlinear model for each hospital, controlling for temporal trends, seasonality, relative humidity, federal holidays, and day of the week. The relationship between ambient temperature and emergency department visits was fitted using a quadratic B-spline with 3 degrees of freedom and the time-response function was fitted using a natural cubic B-spline with 2 knots placed at equal intervals on the log scale of lags up to 7 days. Relative risks are then pooled across the 47 participating hospitals using multivariate random-effect meta-analyses with hospital-specific mean and range of temperatures as the predictors. The mean minimum morbidity daily maximum temperature across the 47 children's hospitals was the reference temperature.

**Figure S4.** Sensitivity analyses controlling for air pollutants and seasonality on the association of specific causes of emergency department visits with daily maximum warm season (May to September) temperature among 47 participating children's hospitals, 2016-2018. Relative risks contrast the 95th percentile of the hospital-specific warm season (May to September) daily maximum temperature distribution to the hospital-specific minimum morbidity temperature (MMT) over lag 0-7 days among 47 participating children's hospitals from May to September, 2016-2018. The temperature-ED visit association was modeled with a quasi-Poisson regression with distributed lag nonlinear model for each hospital, controlling for temporal trends, seasonality, relative humidity, federal holidays, and day of the week. Relative risks are then pooled across the 47 participating hospitals using multivariate random-effect meta-analyses with hospital-specific mean and range of daily maximum temperatures as the predictors.

**Figure S5. Pearson correlation between temperature metrics.** Size and shading of the square is proportional to the correlation coefficients.

**Table S1.** Personal characteristics of the subjects for all causes and heat-related illness, 2016-2018.

**Table S2.** The attributable number and fraction for specific causes of emergency department visits attributable to moderate and extreme heat exposure over lag 0-7 days during May to September from 2016 to 2018 in 47 participating US children's hospitals.

**Table S3.** Stratified pooled relative risk and 95% confidence interval of the association of cause-specific emergency department visits associated with days of extreme heat by age and sex.

**Table S4.** Stratified pooled relative risk and 95% confidence interval of the association of cause-specific emergency department visits associated with days of extreme heat by race and insurance status.

**Table S5.** Sample sizes for stratified analyses shown in tables S3 and S4.

**R Code**

**References**

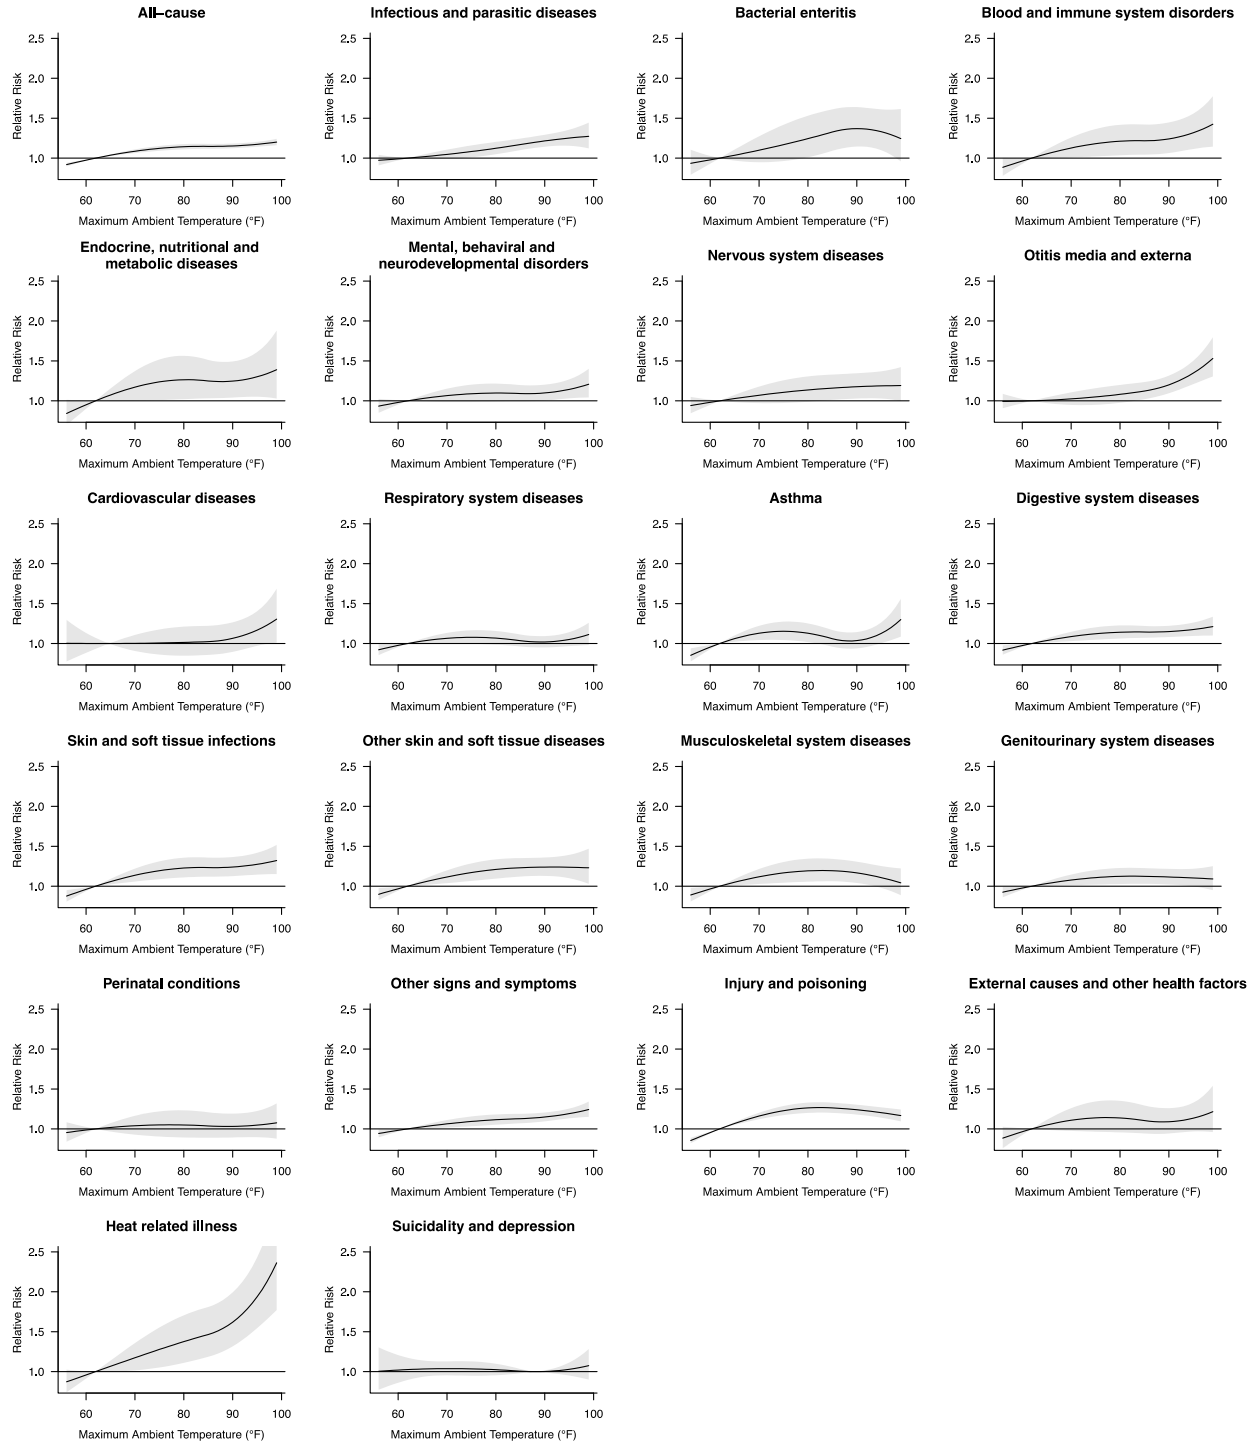

**Figure S1.** Estimated exposure-response functions and 95% confidence intervals of the association between daily maximum temperature and relative risk of emergency department visits for all causes and specific causes, summed over all lags (0-7 days), and fitted using a quadratic B-spline with 3 degrees of freedom. The temperature-ED visit association was modeled with a quasi-Poisson regression with distributed lag nonlinear model for each hospital, controlling for temporal trends, seasonality, relative humidity, federal holidays, and day of the week. Relative risks were then pooled across the 47 participating hospitals using multivariate

random-effect meta-analyses with hospital-specific mean and range of temperatures as the predictors. The mean minimum morbidity daily maximum temperature across the 47 children's hospitals was the reference temperature.

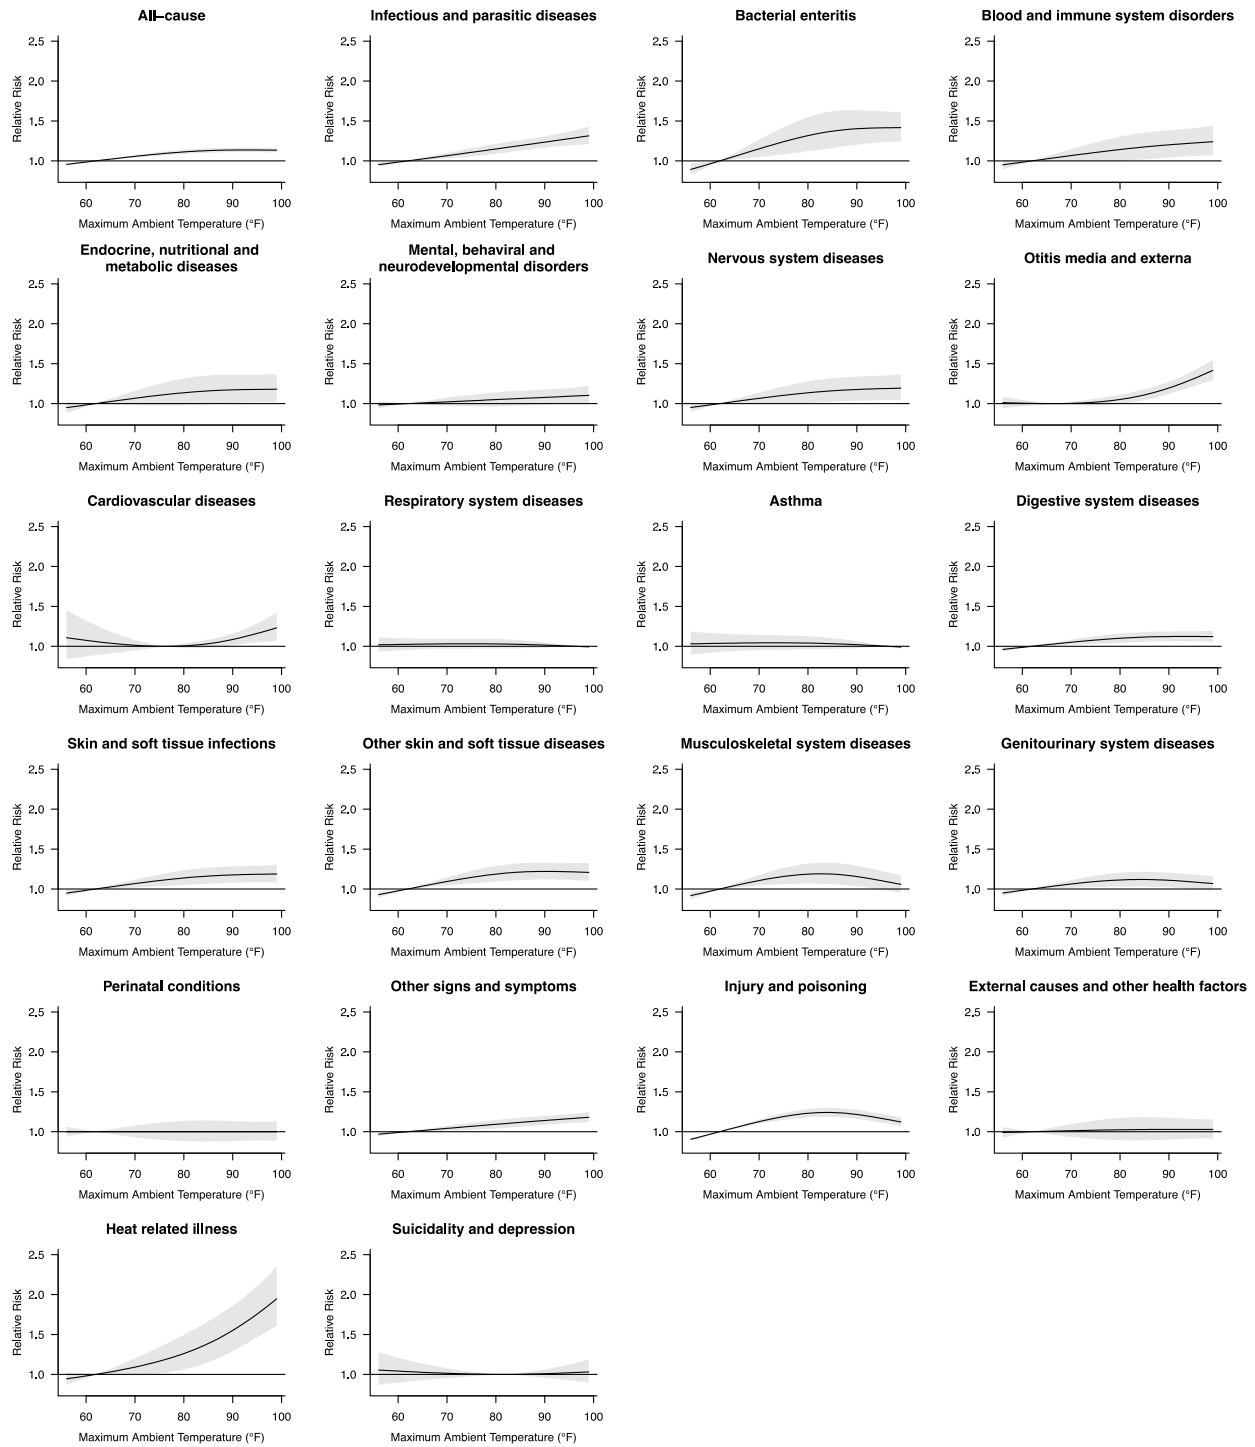

**Figure S2.** Estimated exposure-response functions and 95% confidence intervals as in Figure S1 but fitted with a natural cubic spline with 3 degrees of freedom for ambient temperature.

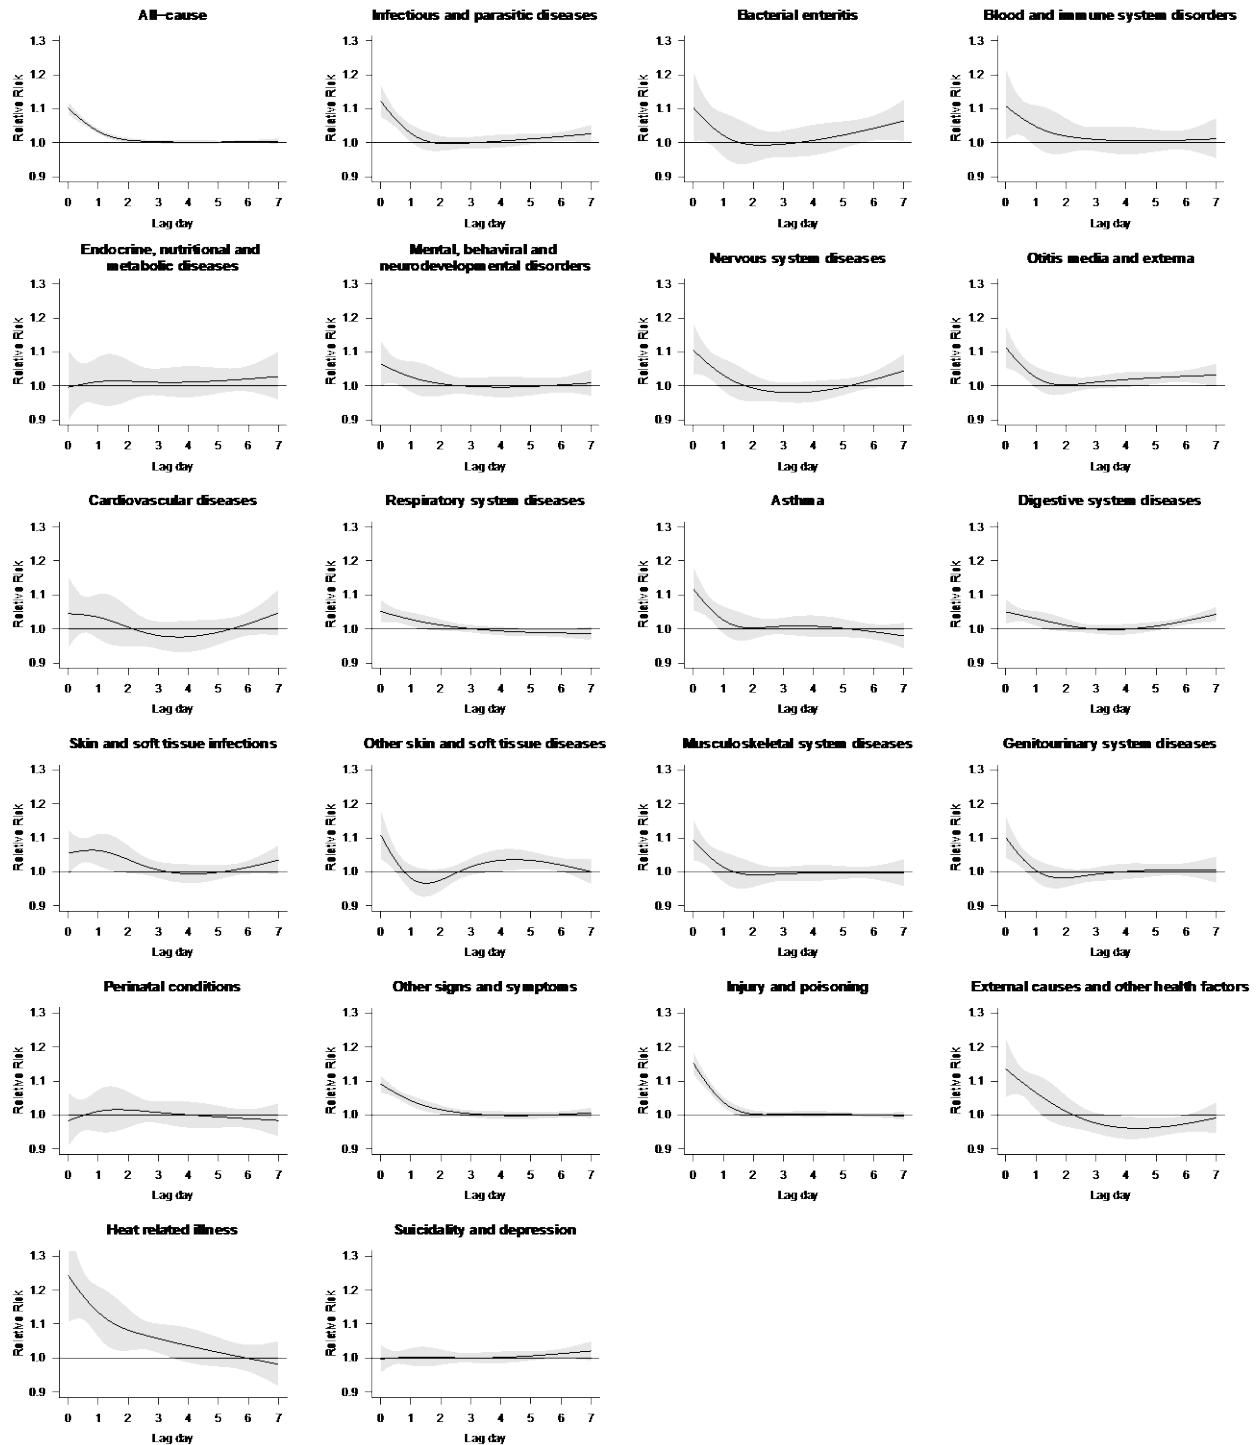

**Figure S3.** Estimated lag-response functions and 95% confidence intervals depicting the time course of the association between daily maximum temperature at the 95th percentile and relative risk of emergency department visits for all causes and specific causes, May through September of 2016-2018. The temperature-ED visit association was modeled with a quasi-Poisson regression with a distributed lag nonlinear model for each hospital, controlling for temporal trends, seasonality, relative humidity, federal holidays, and day of the week. The relationship between ambient temperature and emergency department visits was fitted using a quadratic B-

spline with 3 degrees of freedom and the time-response function was fitted using a natural cubic B-spline with 2 knots placed at equal intervals on the log scale of lags up to 7 days. Relative risks are then pooled across the 47 participating hospitals using multivariate random-effect meta-analyses with hospital-specific mean and range of temperatures as the predictors. The mean minimum morbidity daily maximum temperature across the 47 children's hospitals was the reference temperature.

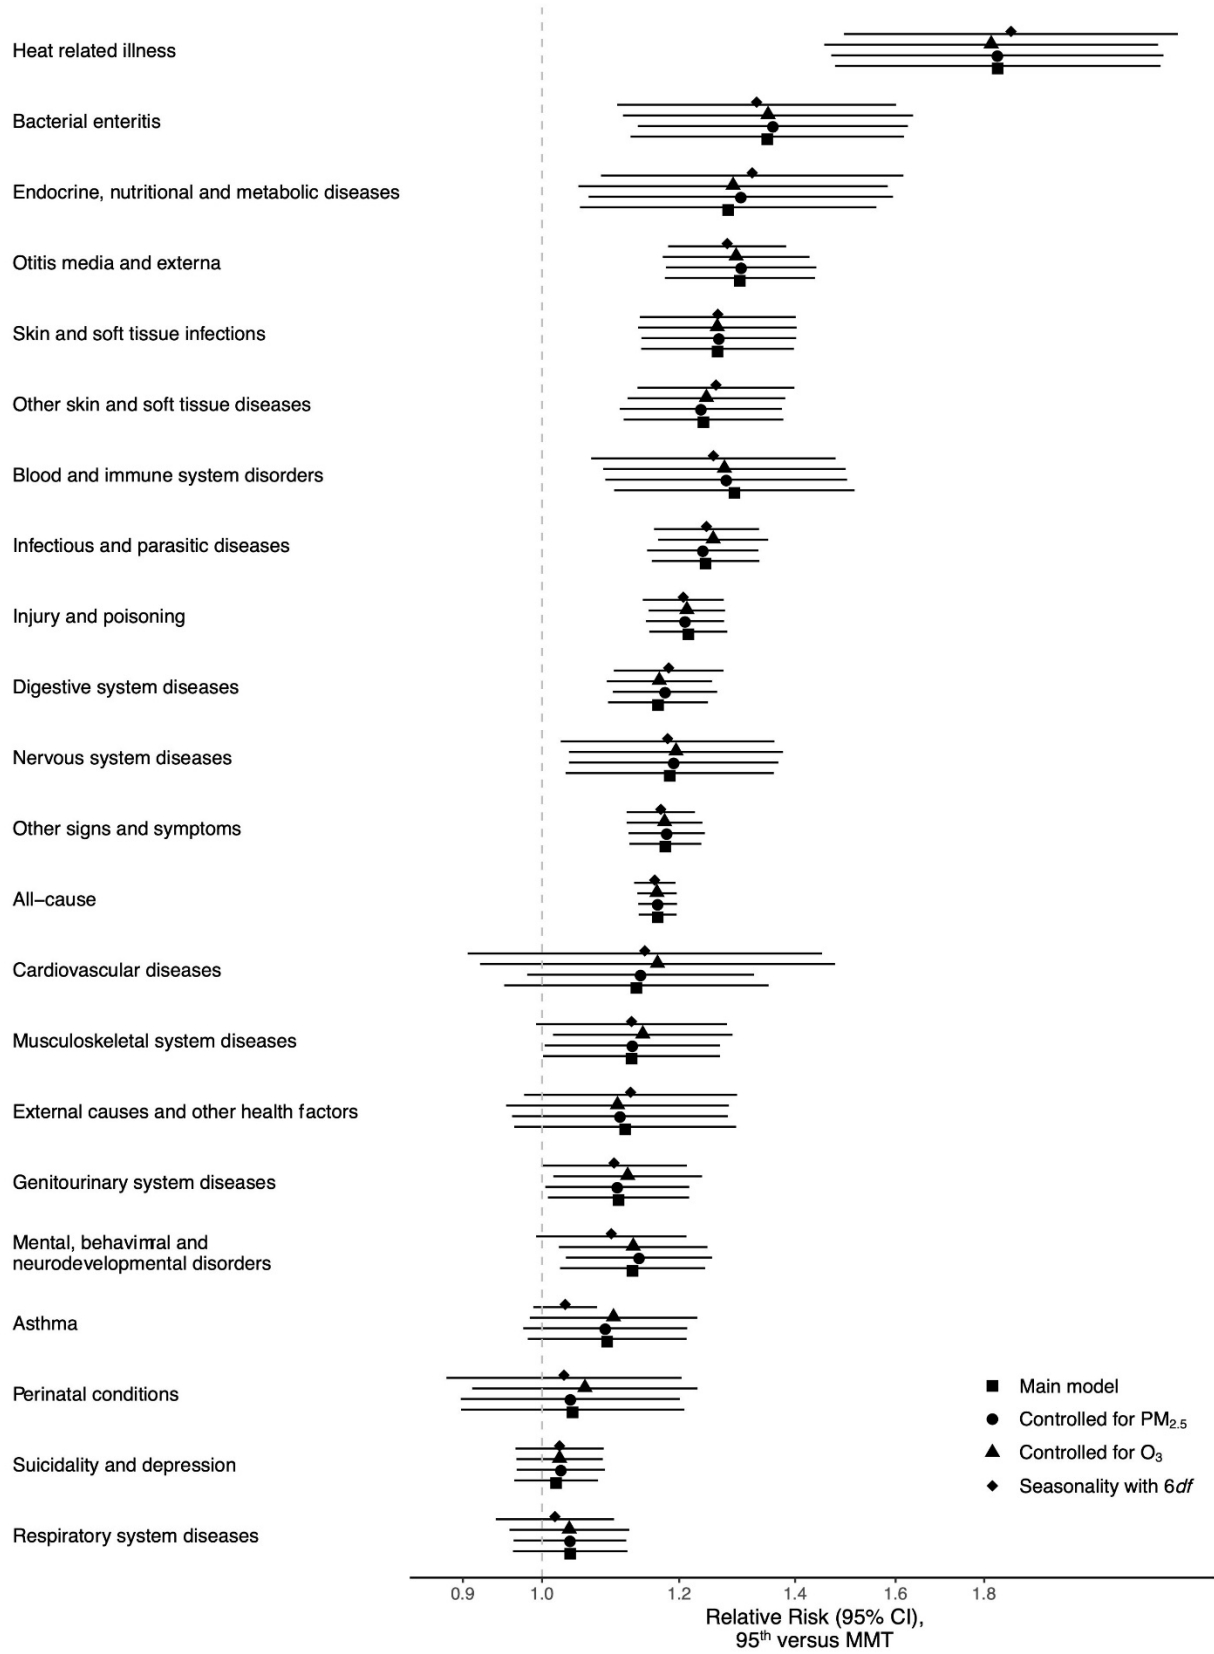

**Figure S4.** Sensitivity analyses controlling for air pollutants and seasonality on the association of



specific causes of emergency department visits with daily maximum warm season (May to September) temperature among 47 participating children's hospitals, 2016-2018. Relative risks contrast the 95th percentile of the hospital-specific warm season (May to September) daily maximum temperature distribution to the hospital-specific minimum morbidity temperature (MMT) over lag 0-7 days among 47 participating children's hospitals from May to September, 2016-2018. The temperature-ED visit association was modeled with a quasi-Poisson regression with distributed lag nonlinear model for each hospital, controlling for temporal trends, seasonality, relative humidity, federal holidays, and day of the week. Relative risks are then pooled across the 47 participating hospitals using multivariate random-effect meta-analyses with hospital-specific mean and range of daily maximum temperatures as the predictors

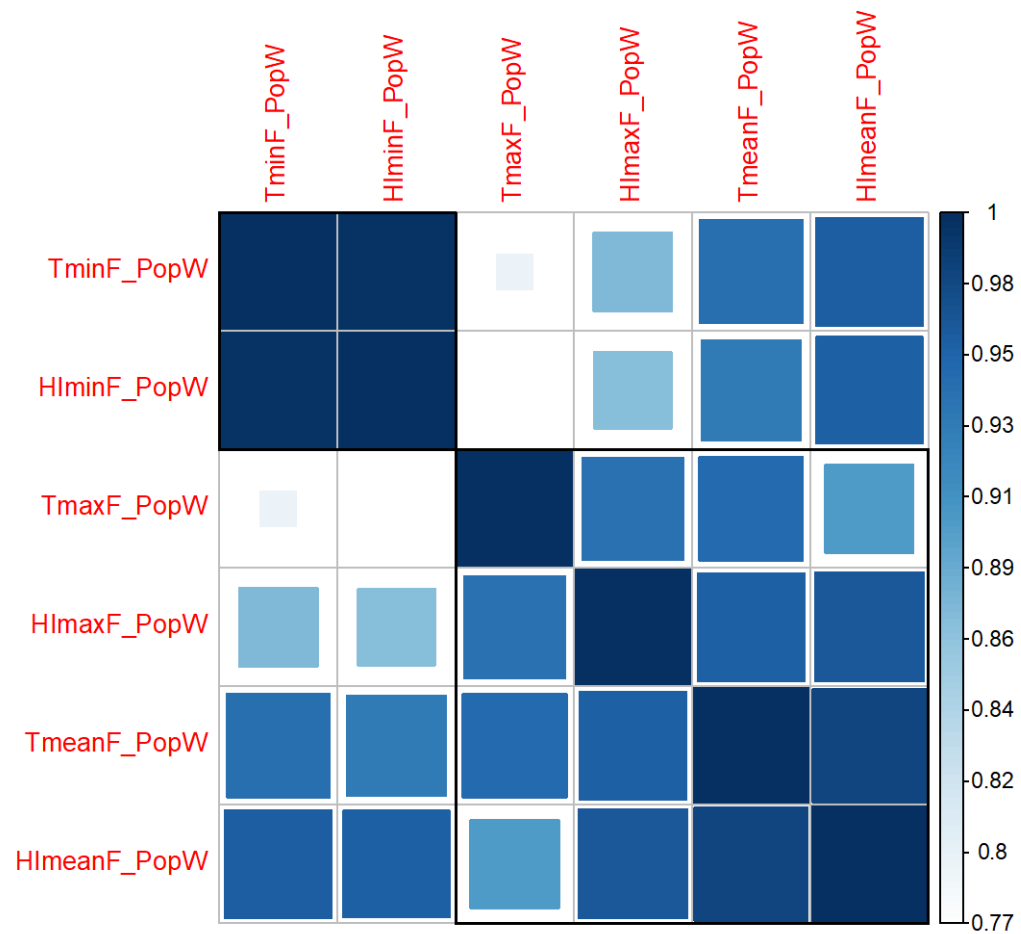

**Figure S5. Pearson correlation between temperature metrics.** Size and shading of the square is proportional to the correlation coefficients.

Note: TminF\_PopW, population-weighted daily minimum ambient temperature; TmeanF\_PopW, population-weighted daily mean ambient temperature; TmaxF\_PopW, population-weighted daily maximum ambient temperature; HlminF\_PopW, population-weighted daily minimum heat index; HlmeanF\_PopW, population-weighted daily mean heat index; HlmaxF\_PopW, population-weighted daily maximum heat index. Calculation of heat index was based upon the National Weather Service regression model ([https://www.wpc.ncep.noaa.gov/html/heatindex\\_equation.shtml](https://www.wpc.ncep.noaa.gov/html/heatindex_equation.shtml)).

**Table S1.** Personal characteristics of the subjects for all causes and heat-related illness, 2016-2018.

| Personal characteristics | All-cause<br>N (%)<br>(N=3,812,395) | Heat-related illness<br>N (%)<br>(N=28,729) |
|--------------------------|-------------------------------------|---------------------------------------------|
| Age                      |                                     |                                             |
| 0-5 y                    | 2,075,518 (54.4)                    | 17,297 (60.2)                               |
| 6-12 y                   | 1,058,161 (27.8)                    | 6,319 (22.0)                                |
| 13-18 y                  | 678,716 (17.8)                      | 5,113 (17.8)                                |
| Sex                      |                                     |                                             |
| Male                     | 2,024,190 (53.1)                    | 14,647 (51.0)                               |
| Female                   | 1,787,677 (46.9)                    | 14,077 (49.0)                               |
| Race <sup>A</sup>        |                                     |                                             |
| White                    | 1,839,315 (48.2)                    | 17,244 (60.0)                               |
| Black                    | 1,072,037 (28.1)                    | 5,647 (19.7)                                |
| Asian                    | 104,615 (2.7)                       | 889 (3.1)                                   |
| Pacific Islander         | 14,506 (0.4)                        | 110 (0.4)                                   |
| American Indian          | 13,348 (0.4)                        | 95 (0.3)                                    |
| Other                    | 597,996 (15.7)                      | 3,734 (13.0)                                |
| Unknown                  | 225,061(5.9)                        | 1,413 (4.9)                                 |
| Ethnicity                |                                     |                                             |

|                        |                  |               |
|------------------------|------------------|---------------|
| Hispanic or Latino     | 1,057,184 (27.7) | 6,519 (22.7)  |
| Not Hispanic or Latino | 2,509,678 (65.8) | 20,260 (70.5) |
| Unknown                | 245,533 (6.4)    | 1,950 (6.8)   |
| Insurance Status       |                  |               |
| Public                 | 2,445,946 (64.2) | 16,882 (58.8) |
| Private                | 1,026,164 (26.9) | 10,028 (34.9) |
| Other/unknown          | 340,285 (8.9)    | 1,819 (6.3)   |

---

<sup>A</sup> Some patients were identified with multiple race categories, which results in some totals greater than 100%.

**Table S2.** The attributable number and fraction for specific causes of emergency department visits attributable to moderate and extreme heat exposure over lag 0-7 days during May to September from 2016 to 2018 in 47 participating US children’s hospitals.

| Causes of emergency department visits               | Moderate heat                       |                               | Extreme heat                        |                               |
|-----------------------------------------------------|-------------------------------------|-------------------------------|-------------------------------------|-------------------------------|
|                                                     | Attributable fraction (95% eCI) (%) | Attributable number (95% eCI) | Attributable fraction (95% eCI) (%) | Attributable number (95% eCI) |
| Heat related illness                                | 28.3 (15.6, 33.8)                   | 8135 (4478, 9719)             | 2.6 (1.9, 2.9)                      | 760 (547, 837)                |
| Otitis media and externa                            | 12.0 (7.2, 15.3)                    | 16241 (9750, 20670)           | 1.5 (1.1, 1.7)                      | 1964 (1536, 2237)             |
| Bacterial enteritis                                 | 23.7 (12.1, 29.2)                   | 9843 (5010, 12119)            | 1.4 (0.8, 1.7)                      | 599 (338, 720)                |
| Infectious and parasitic diseases                   | 12.7 (10.6, 14.4)                   | 34092 (28644, 38623)          | 1.2 (1.0, 1.4)                      | 3208 (2563, 3694)             |
| Blood and immune system disorders                   | 15.8 (10.0, 19.9)                   | 5210 (3282, 6562)             | 1.2 (0.9, 1.5)                      | 404 (289, 486)                |
| Nervous system diseases                             | 13.6 (5.9, 18.0)                    | 9176 (4011, 12180)            | 0.9 (0.5, 1.2)                      | 624 (310, 800)                |
| Skin and soft tissue infections                     | 16.6 (14.1, 18.6)                   | 16002 (13609, 17940)          | 1.2 (0.9, 1.3)                      | 1117 (884, 1278)              |
| Other skin and soft tissue diseases                 | 15.7 (12.5, 18.1)                   | 14467 (11463, 16633)          | 1.1 (0.7, 1.3)                      | 971 (616, 1189)               |
| Other signs and symptoms                            | 10.5 (7.5, 12.8)                    | 78415 (56547, 96051)          | 0.9 (0.7, 1.0)                      | 6379 (5042, 7360)             |
| Endocrine, nutritional and metabolic diseases       | 18.0 (7.7, 22.7)                    | 4604 (1982, 5801)             | 1.3 (0.5, 1.6)                      | 322 (126, 406)                |
| Cardiovascular diseases                             | 9.6 (-4.1, 15.8)                    | 1758 (-757, 2896)             | 1.1 (0.6, 1.5)                      | 209 (101, 266)                |
| Digestive system diseases                           | 11.0 (7.2, 13.9)                    | 28722 (18812, 36387)          | 0.8 (0.5, 0.9)                      | 2016 (1377, 2474)             |
| All-cause                                           | 11.0 (9.4, 12.6)                    | 420745 (357890, 480468)       | 0.7 (0.6, 0.8)                      | 27351 (23866, 30357)          |
| Mental, behavioral and neurodevelopmental disorders | 9.3 (5.6, 11.9)                     | 6477 (3941, 8349)             | 0.7 (0.5, 0.8)                      | 460 (336, 563)                |
| Injury and poisoning                                | 17.0 (14.0, 19.3)                   | 157737 (13034, 179733)        | 0.8 (0.6, 0.9)                      | 7206 (5485, 8479)             |
| Genitourinary system diseases                       | 9.1 (5.9, 11.5)                     | 9806 (6345, 12459)            | 0.5 (0.2, 0.7)                      | 546 (186, 775)                |
| External causes and other health factors            | 11.2 (2.7, 15.8)                    | 9384 (2274, 13216)            | 0.8 (0.4, 1.1)                      | 710 (302, 936)                |

|                                 |                  |                      |                 |                   |
|---------------------------------|------------------|----------------------|-----------------|-------------------|
| Respiratory system diseases     | 8.1 (4.5, 10.7)  | 47596 (26176, 62729) | 0.6 (0.4, 0.7)  | 3380 (2084, 4281) |
| Musculoskeletal system diseases | 10.2 (4.3, 14.0) | 10503 (4391, 14380)  | 0.4 (0.0, 0.6)  | 441 (25, 655)     |
| Asthma                          | 10.9 (5.5, 14.6) | 12848 (6497, 17211)  | 0.8 (0.5, 1.0)  | 969 (571, 1218)   |
| Perinatal conditions            | 6.3 (-1.6, 10.9) | 2922 (-730, 5084)    | 0.4 (-0.0, 0.7) | 199 (-6.4, 340)   |
| Suicidality and depression      | 3.5 (-1.4, 6.6)  | 1155 (-460, 2202)    | 0.3 (0.0, 0.5)  | 108 (12, 177)     |

Note: We fitted a time-series Poisson regression for each hospital, controlling for temporal trends, seasonality, relative humidity, federal holiday, and day of the week. We estimated temperature-ED visits associations with a distributed lag nonlinear model with 7 days of lag, and then pooled them in a multivariate random-effect meta-analyses with hospital-specific mean and range of daily maximum temperatures as the predictors. We then calculated the attributable number and fraction of ED visits based on the best linear unbiased prediction of the overall cumulative exposure-response association in each hospital. Moderate heat was defined as ambient temperature between cause-specific, hospital-specific minimum morbidity temperature (MMT) and the 95<sup>th</sup> percentile of the cause-specific, hospital-specific warm season daily maximum temperature distribution; and extreme heat was defined as ambient temperature at or above the 95<sup>th</sup> percentile of the cause-specific, hospital-specific warm season daily maximum temperature distribution. Points and whiskers denote the fraction and number of ED visits (and 95% confidence intervals). eCI, empirical confidence interval.

**Table S3.** Stratified pooled relative risk and 95% confidence interval of the association of cause-specific emergency department visits associated with days of extreme heat by age and sex.

| Disease                                             | Age               |                   |                   |                           | Sex               |                   |                           |
|-----------------------------------------------------|-------------------|-------------------|-------------------|---------------------------|-------------------|-------------------|---------------------------|
|                                                     | 0-5y              | 6-12 y            | 13-18 y           | p-value for heterogeneity | Male              | Female            | p-value for heterogeneity |
| Otitis media and externa                            | 1.24 (1.1, 1.39)  | 1.7 (1.5, 1.93)   | 1.68 (1.39, 2.04) | <0.001                    | 1.31 (1.17, 1.47) | 1.3 (1.12, 1.51)  | 0.87                      |
| Bacterial enteritis                                 | 1.31 (1.02, 1.67) | 1.49 (1.09, 2.04) | 1.51 (0.97, 2.34) | 0.70                      | 1.47 (1.18, 1.82) | 1.24 (1.09, 1.4)  | 0.12                      |
| Infectious and parasitic diseases                   | 1.32 (1.21, 1.44) | 1.11 (1.01, 1.22) | 1.09 (0.89, 1.32) | 0.01                      | 1.31 (1.19, 1.43) | 1.19 (1.1, 1.3)   | 0.14                      |
| Nervous system diseases                             | 1.26 (1, 1.6)     | 1.13 (0.94, 1.36) | 1.21 (1.06, 1.39) | 0.73                      | 1.33 (1.08, 1.63) | 1.1 (0.94, 1.28)  | 0.14                      |
| Blood and immune system disorders                   | 1.47 (1.13, 1.91) | 1.17 (0.89, 1.54) | 1.43 (1.04, 1.97) | 0.39                      | 1.51 (1.21, 1.9)  | 1.16 (0.91, 1.48) | 0.10                      |
| Skin and soft tissue infections                     | 1.22 (1.06, 1.4)  | 1.32 (1.11, 1.58) | 1.42 (1.12, 1.79) | 0.48                      | 1.34 (1.16, 1.54) | 1.21 (1.06, 1.38) | 0.31                      |
| Endocrine, nutritional, and metabolic diseases      | 1.55 (1.07, 2.26) | 1.16 (0.85, 1.58) | 1.34 (0.97, 1.85) | 0.48                      | 1.24 (0.91, 1.69) | 1.36 (1.04, 1.79) | 0.63                      |
| Other signs and symptoms                            | 1.22 (1.16, 1.29) | 1.12 (1.05, 1.21) | 1.15 (1.04, 1.27) | 0.17                      | 1.16 (1.1, 1.23)  | 1.19 (1.12, 1.27) | 0.53                      |
| Cardiovascular diseases                             | 1.15 (0.78, 1.71) | 1.52 (0.95, 2.44) | 1.28 (1.07, 1.53) | 0.20                      | 1.4 (1.02, 1.91)  | 1.12 (0.97, 1.3)  | 0.19                      |
| Other skin and soft tissue diseases                 | 1.25 (1.09, 1.44) | 1.2 (1, 1.43)     | 1.36 (1.04, 1.78) | 0.73                      | 1.27 (1.11, 1.45) | 1.26 (1.1, 1.46)  | 0.69                      |
| Digestive system diseases                           | 1.14 (1.05, 1.25) | 1.27 (1.15, 1.41) | 1.07 (0.94, 1.23) | 0.10                      | 1.21 (1.12, 1.3)  | 1.12 (1.02, 1.23) | 0.24                      |
| Mental, behavioral and neurodevelopmental disorders | 1.11 (0.91, 1.35) | 1.1 (0.94, 1.29)  | 1.18 (1.04, 1.33) | 0.76                      | 1.17 (1.01, 1.36) | 1.11 (0.97, 1.28) | 0.61                      |
| Injury and poisoning                                | 1.19 (1.12, 1.25) | 1.2 (1.11, 1.3)   | 1.29 (1.17, 1.42) | 0.30                      | 1.24 (1.16, 1.31) | 1.19 (1.12, 1.26) | 0.34                      |
| Genitourinary system diseases                       | 1.22 (1.07, 1.38) | 1.08 (0.9, 1.28)  | 1.04 (0.88, 1.22) | 0.24                      | 1.15 (1, 1.33)    | 1.08 (0.97, 1.2)  | 0.43                      |
| Musculoskeletal system diseases                     | 1.1 (0.92, 1.32)  | 1.07 (0.91, 1.26) | 1.13 (0.97, 1.3)  | 0.79                      | 1.08 (0.95, 1.23) | 1.12 (0.97, 1.3)  | 0.53                      |
| External causes and other health factors            | 1.19 (1.12, 1.25) | 1.2 (1.11, 1.3)   | 1.29 (1.17, 1.42) | 0.30                      | 1.24 (1.16, 1.31) | 1.19 (1.12, 1.26) | 0.34                      |
| Perinatal conditions                                | 1.04 (0.9, 1.21)  | NA                | NA                | NA                        | 1.01 (0.94, 1.07) | 1.21 (0.98, 1.49) | 0.08                      |

|                             |                   |                   |                   |      |                   |                   |      |
|-----------------------------|-------------------|-------------------|-------------------|------|-------------------|-------------------|------|
| Respiratory system diseases | 1.02 (0.94, 1.11) | 1.09 (0.97, 1.22) | 1.11 (0.98, 1.26) | 0.37 | 1.05 (0.97, 1.14) | 1.02 (0.93, 1.12) | 0.61 |
| Asthma                      | 1.1 (0.97, 1.24)  | 1.13 (0.98, 1.3)  | 1.1 (0.87, 1.4)   | 0.87 | 1.16 (1.03, 1.3)  | 1.03 (0.98, 1.09) | 0.03 |
| Suicidality and depression  | NA                | 1.01 (0.89, 1.14) | 1.02 (0.95, 1.09) | 0.90 | 1.07 (0.84, 1.37) | 1.01 (0.93, 1.08) | 0.60 |

<sup>A</sup>: Relative risks contrast the 95th percentile of the county-specific warm season (May to September) daily maximum temperature distribution to the county-specific minimum morbidity temperature (MMT), over lag 0-7 days among 47 participating children’s hospitals from May to September, 2016-2018. The temperature-ED visit association was modeled with a quasi-Poisson regression with distributed lag nonlinear model for each hospital, controlling for temporal trends, seasonality, relative humidity, federal holidays, and day of the week. Relative risks are then pooled across the 47 participating hospitals using multivariate random-effect meta-analyses with hospital-specific mean and range of temperatures as the predictors. The temperature-ED visit association was modeled with a quasi-Poisson regression with distributed lag nonlinear model for each hospital, controlling for temporal trends, seasonality, relative humidity, federal holidays, and day of the week. Relative risks are then pooled across the 47 participating hospitals using multivariate random-effect meta-analyses with hospital-specific mean and range of temperatures as the predictors.

<sup>B</sup> NA=not applicable



**Table S4.** Stratified pooled relative risk and 95% confidence interval of the association of cause-specific emergency department visits associated with days of extreme heat by race and insurance status.

| Disease                                             | Race              |                   | p-value for heterogeneity | Insurance Status  |                   |                   |                           |
|-----------------------------------------------------|-------------------|-------------------|---------------------------|-------------------|-------------------|-------------------|---------------------------|
|                                                     | White             | Other groups      |                           | Public            | Private           | Other/unknown     | p-value for heterogeneity |
| Otitis media and externa                            | 1.16 (0.96, 1.41) | 1.36 (1.17, 1.57) | 0.21                      | 1.26 (1.17, 1.36) | 1.47 (1.19, 1.82) | 1.48 (1.1, 1.98)  | 0.24                      |
| Bacterial enteritis                                 | 1.11 (0.99, 1.25) | 1.57 (1.31, 1.87) | <0.001                    | 1.6 (1.36, 1.89)  | 1.33 (0.96, 1.83) | NA                | 0.04                      |
| Infectious and parasitic diseases                   | 1.26 (1.1, 1.45)  | 1.25 (1.12, 1.39) | 0.81                      | 1.25 (1.13, 1.39) | 1.21 (1.04, 1.39) | 1.21 (1.06, 1.37) | 0.83                      |
| Nervous system diseases                             | 1.05 (0.99, 1.12) | 1.26 (1.02, 1.55) | <0.001                    | 1.2 (1.01, 1.43)  | 1.27 (1.02, 1.58) | 1.15 (0.73, 1.8)  | 0.81                      |
| Blood and immune system disorders                   | 1.24 (0.91, 1.7)  | 1.25 (1.01, 1.55) | 0.71                      | 1.3 (1.03, 1.63)  | 1.32 (1.01, 1.73) | NA                | 0.04                      |
| Skin and soft tissue infections                     | 1.12 (0.91, 1.39) | 1.37 (1.19, 1.58) | 0.12                      | 1.25 (1.09, 1.44) | 1.25 (1.02, 1.53) | 1.51 (0.98, 2.34) | 0.71                      |
| Endocrine, nutritional and metabolic diseases       | 1.08 (0.97, 1.21) | 1.5 (1.14, 1.98)  | 0.001                     | 1.19 (0.88, 1.62) | 1.46 (1.08, 1.97) | NA                | 0.33                      |
| Other signs and symptoms                            | 1.16 (1.07, 1.25) | 1.22 (1.13, 1.31) | 0.32                      | 1.19 (1.1, 1.28)  | 1.09 (1.02, 1.16) | 1.22 (0.96, 1.54) | 0.04                      |
| Cardiovascular diseases                             | 1.29 (0.81, 2.06) | 1.41 (1.01, 1.96) | 0.17                      | 1.2 (0.86, 1.68)  | 1.19 (0.93, 1.51) | NA                | 0.90                      |
| Other skin and soft tissue diseases                 | 1.25 (1, 1.58)    | 1.25 (1.09, 1.44) | 0.88                      | 1.18 (1.02, 1.36) | 1.63 (1.24, 2.15) | NA                | 0.06                      |
| Digestive system diseases                           | 1.17 (1.05, 1.3)  | 1.24 (1.12, 1.38) | 0.22                      | 1.19 (1.07, 1.33) | 1.19 (1.05, 1.35) | 1.19 (0.9, 1.57)  | 0.86                      |
| Mental, behavioral and neurodevelopmental disorders | 1.01 (0.96, 1.05) | 1.26 (1.08, 1.46) | <0.001                    | 1.14 (0.97, 1.33) | 1.12 (0.97, 1.31) | NA                | 0.54                      |
| Injury and poisoning                                | 1.11 (1.03, 1.19) | 1.29 (1.21, 1.38) | 0.002                     | 1.26 (1.16, 1.37) | 1.16 (1.1, 1.22)  | 1.37 (1.12, 1.67) | 0.07                      |
| Genitourinary system diseases                       | 1.06 (0.99, 1.13) | 1.1 (0.97, 1.24)  | 0.21                      | 1.09 (0.95, 1.25) | 1.16 (0.99, 1.37) | 1.17 (0.84, 1.63) | 0.76                      |
| Musculoskeletal system diseases                     | 1.29 (1.08, 1.55) | 1.2 (1.03, 1.39)  | 0.09                      | 1.18 (1.01, 1.39) | 1.04 (0.98, 1.1)  | 1.22 (0.88, 1.69) | 0.01                      |
| External causes and other health factors            | 1.11 (1.03, 1.19) | 1.29 (1.21, 1.38) | 0.002                     | 1.26 (1.16, 1.37) | 1.16 (1.1, 1.22)  | 1.37 (1.12, 1.67) | 0.07                      |
| Perinatal conditions                                | 1.06 (0.77, 1.45) | 1.13 (0.9, 1.43)  | 0.47                      | 1.06 (0.85, 1.32) | 1.02 (0.93, 1.13) | NA                | 0.93                      |

|                             |                   |                   |      |                   |                   |                   |      |
|-----------------------------|-------------------|-------------------|------|-------------------|-------------------|-------------------|------|
|                             |                   |                   |      |                   |                   |                   |      |
| Respiratory system diseases | 1.05 (1, 1.09)    | 1.06 (0.98, 1.16) | 0.51 | 1.05 (0.95, 1.15) | 1.04 (0.92, 1.17) | 1.08 (0.93, 1.26) | 0.85 |
| Asthma                      | 1.05 (0.96, 1.15) | 1.18 (1.03, 1.34) | 0.16 | 1.11 (0.98, 1.26) | 1.09 (0.88, 1.35) | 1.1 (0.89, 1.35)  | 0.96 |
| Suicidality and depression  | 1.23 (0.97, 1.57) | 1.05 (0.93, 1.18) | 0.11 | 1.01 (0.94, 1.09) | 1.16 (0.94, 1.45) | NA                | 0.09 |

<sup>A</sup>: Relative risks contrast the 95th percentile of the hospital-specific warm season (May to September) daily maximum temperature distribution to the hospital-specific minimum morbidity temperature (MMT), over lag 0-7 days among 47 participating children's hospitals from May to September, 2016-2018. The temperature-ED visit association was modeled with a quasi-Poisson regression with distributed lag nonlinear model for each hospital, controlling for temporal trends, seasonality, relative humidity, federal holidays, and day of the week. Relative risks are then pooled across the 47 participating hospitals using multivariate random-effect meta-analyses with hospital-specific mean and range of temperatures as the predictors. The temperature-ED visit association was modeled with a quasi-Poisson regression with distributed lag nonlinear model for each hospital, controlling for temporal trends, seasonality, relative humidity, federal holidays, and day of the week. Relative risks are then pooled across the 47 participating hospitals using multivariate random-effect meta-analyses with hospital-specific mean and range of temperatures as the predictors.

<sup>B</sup> NA=not applicable

**Table S5.** Sample sizes for stratified analyses shown in tables S3 and S4

|                                                | 0-5y   | 6-12y  | 13-18y | Male   | Female | White  | Minority race | Public insurance | Private insurance | Other insurance |
|------------------------------------------------|--------|--------|--------|--------|--------|--------|---------------|------------------|-------------------|-----------------|
| Infectious and parasitic diseases              | 202980 | 46440  | 19725  | 142261 | 126875 | 108536 | 160232        | 196220           | 49235             | 23690           |
| Endocrine, nutritional, and metabolic diseases | 5956   | 8831   | 10798  | 11892  | 13688  | 15124  | 10474         | 14566            | 9542              | 1477            |
| Blood and immune system disorders              | 13023  | 9991   | 9894   | 17199  | 15709  | 10930  | 21890         | 20482            | 10609             | 1817            |
| Mental, behavioral and neurodevelopmental      | 2739   | 24326  | 42930  | 33615  | 36330  | 40682  | 29139         | 39556            | 26581             | 3858            |
| Nervous system diseases                        | 19491  | 22249  | 25787  | 31646  | 35865  | 38482  | 28832         | 38997            | 24124             | 4406            |
| Otitis media and externa                       | 99459  | 27703  | 8147   | 73481  | 61827  | 57740  | 77768         | 99913            | 21959             | 13437           |
| Cardiovascular diseases                        | 6305   | 5782   | 6223   | 10126  | 8146   | 10304  | 7954          | 10368            | 6409              | 1533            |
| Respiratory system diseases                    | 396829 | 137569 | 51844  | 330639 | 255586 | 234210 | 351510        | 414447           | 121922            | 49873           |
| Digestive system diseases                      | 132363 | 82198  | 47254  | 136371 | 125439 | 132492 | 129291        | 171256           | 69350             | 21209           |
| Genitourinary system diseases                  | 46666  | 30579  | 31073  | 40332  | 67983  | 55856  | 52055         | 68381            | 29782             | 10155           |
| Musculoskeletal system diseases                | 25615  | 39598  | 37404  | 50570  | 52034  | 48684  | 53820         | 63126            | 30645             | 8846            |
| Perinatal conditions                           | 46474  | 30     | 10     | 24998  | 21507  | 24078  | 22469         | 28219            | 13424             | 4871            |
| Other signs and symptoms                       | 422008 | 191122 | 136007 | 377626 | 371457 | 381054 | 368204        | 476021           | 203217            | 69899           |
| Injury and poisoning                           | 416942 | 324516 | 188196 | 533132 | 396272 | 498704 | 430337        | 524118           | 321725            | 83811           |
| External causes and other health factors       | 52380  | 19224  | 12116  | 43236  | 40438  | 37020  | 46397         | 54303            | 18565             | 10852           |
| Heat related illness                           | 17297  | 6319   | 5113   | 14647  | 14077  | 17214  | 11485         | 16882            | 10028             | 1819            |
| Asthma                                         | 59858  | 44216  | 13523  | 73506  | 44088  | 36220  | 81261         | 82450            | 25998             | 9149            |
| Bacterial enteritis                            | 28365  | 9192   | 3913   | 22238  | 19230  | 18210  | 23112         | 28846            | 9796              | 2828            |
| Skin and soft tissue infections                | 51004  | 28039  | 17437  | 49099  | 47378  | 45934  | 50266         | 64970            | 22212             | 9298            |

|                                     |         |         |        |         |         |         |         |         |         |        |
|-------------------------------------|---------|---------|--------|---------|---------|---------|---------|---------|---------|--------|
| Other skin and soft tissue diseases | 54900   | 24617   | 12518  | 46689   | 45344   | 36202   | 55889   | 67339   | 15341   | 9355   |
| Suicidality and depression          | 573     | 8583    | 24073  | 12489   | 20738   | 20398   | 12915   | 16948   | 14537   | 1744   |
| Total                               | 2075518 | 1058161 | 678716 | 2024190 | 1787677 | 1836806 | 1973080 | 2445946 | 1026164 | 340285 |

## References

- Gasparrini A, Guo Y, Hashizume M, Kinney PL, Petkova EP, Lavigne E, et al. 2015. Temporal variation in heat–mortality associations: A multicountry study. *Environ Health Perspect* 123:1200–1207; doi:10.1289/ehp.1409070.
- Gasparrini A, Guo Y, Hashizume M, Lavigne E, Tobias A, Zanobetti A, et al. 2016. Changes in Susceptibility to Heat during the Summer: A Multicountry Analysis. *Am J Epidemiol* 183:1027–1036; doi:10.1093/aje/kwv260.

## R Code

```
### (c) Antonio Gasparrini 2015-2017
#####
# FUNCTION FOR COMPUTING ATTRIBUTABLE MEASURES FROM DLNM
# REQUIRES dlnm VERSION 2.2.0 AND ON
#####
#
# Version: 25 January 2017
#
#####
#
# - x: AN EXPOSURE VECTOR OR (ONLY FOR dir="back") A MATRIX OF LAGGED EXPOSURES
# - basis: THE CROSS-BASIS COMPUTED FROM x
# - cases: THE CASES VECTOR OR (ONLY FOR dir="forw") THE MATRIX OF FUTURE CASES
# - model: THE FITTED MODEL
# - coef AND vcov: COEF AND VCOV FOR basis IF model IS NOT PROVIDED
# - type: EITHER "an" OR "af" FOR ATTRIBUTABLE NUMBER OR FRACTION
# - dir: EITHER "back" OR "forw" FOR BACKWARD OR FORWARD PERSPECTIVES
# - tot: IF TRUE, THE TOTAL ATTRIBUTABLE RISK IS COMPUTED
# - cen: THE REFERENCE VALUE USED AS COUNTERFACTUAL SCENARIO
# - range: THE RANGE OF EXPOSURE. IF NULL, THE WHOLE RANGE IS USED
# - sim: IF SIMULATION SAMPLES SHOULD BE RETURNED. ONLY FOR tot=TRUE
# - nsim: NUMBER OF SIMULATION SAMPLES
#####
attrdl <- function(x,basis,cases,model=NULL,coef=NULL,vcov=NULL,type="af",
  dir="back",tot=TRUE,cen,range=NULL,sim=FALSE,nsim=5000) {
  #####
  #
  # CHECK VERSION OF THE DLNM PACKAGE
  if(packageVersion("dlnm")<"2.2.0")
    stop("update dlnm package to version >= 2.2.0")
  #
  # EXTRACT NAME AND CHECK type AND dir
  name <- deparse(substitute(basis))
  type <- match.arg(type,c("an","af"))
  dir <- match.arg(dir,c("back","forw"))
  #
  # DEFINE CENTERING
  if(missing(cen) && is.null(cen <- attr(basis,"argvar")$cen))
    stop("'cen' must be provided")
  if(!is.numeric(cen) && length(cen)>1L) stop("'cen' must be a numeric scalar")
}
```

```

attributes(basis)$argvar$cen <- NULL
#
# SELECT RANGE (FORCE TO CENTERING VALUE OTHERWISE, MEANING NULL RISK)
if(!is.null(range)) x[x<range[1]|x>range[2]] <- cen
#
# COMPUTE THE MATRIX OF
# - LAGGED EXPOSURES IF dir="back"
# - CONSTANT EXPOSURES ALONG LAGS IF dir="forw"
lag <- attr(basis,"lag")
if(NCOL(x)==1L) {
  at <- if(dir=="back") tsModel::Lag(x,seq(lag[1],lag[2])) else
  matrix(rep(x,diff(lag)+1),length(x))
} else {
  if(dir=="forw") stop("'x' must be a vector when dir='forw'")
  if(ncol(at <- x)!=diff(lag)+1)
  stop("dimension of 'x' not compatible with 'basis'")
}
#
# NUMBER USED FOR THE CONTRIBUTION AT EACH TIME IN FORWARD TYPE
# - IF cases PROVIDED AS A MATRIX, TAKE THE ROW AVERAGE
# - IF PROVIDED AS A TIME SERIES, COMPUTE THE FORWARD MOVING AVERAGE
# - THIS EXCLUDES MISSING ACCORDINGLY
# ALSO COMPUTE THE DENOMINATOR TO BE USED BELOW
if(NROW(cases)!=NROW(at)) stop("'x' and 'cases' not consistent")
if(NCOL(cases)>1L) {
  if(dir=="back") stop("'cases' must be a vector if dir='back'")
  if(ncol(cases)!=diff(lag)+1) stop("dimension of 'cases' not compatible")
  den <- sum(rowMeans(cases,na.rm=TRUE),na.rm=TRUE)
  cases <- rowMeans(cases)
} else {
  den <- sum(cases,na.rm=TRUE)
  if(dir=="forw")
  cases <- rowMeans(as.matrix(tsModel::Lag(cases,-seq(lag[1],lag[2]))))
}
#
#####
#
# EXTRACT COEF AND VCOV IF MODEL IS PROVIDED
if(!is.null(model)) {
  cond <- paste0(name,"[[:print:]]*v[0-9]{1,2}\\.[0-9]{1,2}")
  if(ncol(basis)==1L) cond <- name
  model.class <- class(model)
  coef <- dlnm::getcoef(model,model.class)
  ind <- grep(cond,names(coef))
  coef <- coef[ind]
  vcov <- dlnm::getvcov(model,model.class)[ind,ind,drop=FALSE]
  model.link <- dlnm::getlink(model,model.class)
  if(model.link!="log") stop("'model' must have a log link function")
}
#

```

```

# IF REDUCED ESTIMATES ARE PROVIDED
typebasis <- ifelse(length(coef)!=ncol(basis),"one","cb")
#
#####
#
# PREPARE THE ARGUMENTS FOR TH BASIS TRANSFORMATION
predvar <- if(typebasis=="one") x else seq(NROW(at))
predlag <- if(typebasis=="one") 0 else dlnm::seqlag(lag)
#
# CREATE THE MATRIX OF TRANSFORMED CENTRED VARIABLES (DEPENDENT ON typebasis)
if(typebasis=="cb") {
  Xpred <- dlnm::mkXpred(typebasis,basis,at,predvar,predlag,cen)
  Xpredall <- 0
  for (i in seq(length(predlag))) {
    ind <- seq(length(predvar))+length(predvar)*(i-1)
    Xpredall <- Xpredall + Xpred[ind,,drop=FALSE]
  }
} else {
  basis <- do.call(onebasis,c(list(x=x),attr(basis,"argvar")))
  Xpredall <- dlnm::mkXpred(typebasis,basis,x,predvar,predlag,cen)
}
#
# CHECK DIMENSIONS
if(length(coef)!=ncol(Xpredall))
  stop("arguments 'basis' do not match 'model' or 'coef'-'vcov'")
if(any(dim(vcov)!=c(length(coef),length(coef))))
  stop("arguments 'coef' and 'vcov' do no match")
if(typebasis=="one" && dir=="back")
  stop("only dir='forw' allowed for reduced estimates")
#
#####
#
# COMPUTE AF AND AN
af <- 1-exp(-drop(as.matrix(Xpredall%*%coef)))
an <- af*cases
#
# TOTAL
# - SELECT NON-MISSING OBS CONTRIBUTING TO COMPUTATION
# - DERIVE TOTAL AF
# - COMPUTE TOTAL AN WITH ADJUSTED DENOMINATOR (OBSERVED TOTAL NUMBER)
if(tot) {
  isna <- is.na(an)
  af <- sum(an[!isna])/sum(cases[!isna])
  an <- af*den
}
#
#####
#
# EMPIRICAL CONFIDENCE INTERVALS
if(!tot && sim) {

```

```

sim <- FALSE
warning("simulation samples only returned for tot=T")
}
if(sim) {
# SAMPLE COEF
k <- length(coef)
eigen <- eigen(vcov)
X <- matrix(rnorm(length(coef)*nsim),nsim)
coefsim <- coef + eigen$vectors %*% diag(sqrt(eigen$values),k) %*% t(X)
# RUN THE LOOP
# pre_ afsim <- (1 - exp(- Xpredall %*% coefsim)) * cases # a matrix
# afsim <- colSums(pre_ afsim,na.rm=TRUE) / sum(cases[!isna],na.rm=TRUE)
afsim <- apply(coefsim,2, function(coefi) {
  ani <- (1-exp(-drop(Xpredall%*%coefi)))*cases
  sum(ani[!is.na(ani)]/sum(cases[!is.na(ani)]))
})
ansim <- afsim*den
}
#
#####
#
res <- if(sim) {
  if(type=="an") ansim else afsim
} else {
  if(type=="an") an else af
}
#
return(res)
}

#
#=====
# This is the sample R code for two-stage-time-series analysis
# =====
library(tidyverse)
library(lubridate)
library(dlnm)
library(splines)
library(mvmeta)

load('phis.rda') # phis is the dataset

hospital_number <- as.character(unique(phis$Hospital_Number)) # get hospital unique number
dlist <- lapply(hospital_number, function(x) dset[dset$Hospital_Number==x,])
names(dlist) <- hospital_number

dis <- names(dlist[[1]])[5:26] # get the name of the diseases that are interested
tab <- matrix(NA,22,4) # create a matrix to store results
colnames(tab) <- c('dis', 'allRRfit', 'allRRlow', 'allRRhigh')
tab[1:22,1] <- dis

```



```

coef <- matrix(NA, length(hospital_number), 3, dimnames=list(hospital_number))
vcov <- vector("list", length(hospital_number))
names(vcov) <- hospital_number
pert <- matrix(NA, length(hospital_number), 119, # create a matrix to store temperature percentiles
              dimnames = list(hospital_number, c("min", paste0('p', 1:9/10),
              paste0('p', 1:99), paste0('p99.', 1:9), "max")))

avgtmean <- sapply(dlist, function(x) mean(x$TmaxF_PopW, na.rm = T)) # hospital-specific average
temperature
rangetmean <- sapply(dlist, function(x) diff(range(x$TmaxF_PopW, na.rm = T)))
#hospital-specific range of temperature

cities <- data.frame(city = hospital_number)
datanew <- data.frame(avgtmean=mean(tapply(avgtmean, cities$city, mean)), # a new dataset for prediction
                    rangetmean=mean(tapply(rangetmean, cities$city, mean)))

for (j in seq_along(dis)) {
  for (i in seq_along(hospital_number)) {
    cat(i, "\n")
    data <- dlist[[i]] %>%
      mutate(dow=wday(Admit_Date),
             year=year(Admit_Date),
             ymonth=format(Admit_Date,"%Y-%m"))

    data$dos <- sequence(tapply(data$Admit_Date, data$year, length))

    # create the cross-basis term for temperature
    cb <- crossbasis(data$TmaxF_PopW, lag = 7, argvar = list(fun='bs', degree=2,
                  knots=median(data$TmaxF_PopW),
                  arglag = list(knots = logknots(7, 2)), group = data$year)

    eval(parse(text=paste0("model <- glm(", dis[j],"~ cb + factor(dow) + factor(holid) +
    ns(dos, 4) + ns(Admit_Date, 3/10) + ns(RHmax_PopW, 4),
    family = quasipoisson, data = data, na.action = 'na.exclude')")))

    red <- crossreduce(cb, model, cen = median(data$TmaxF_PopW))
    coef[i,] <- coef(red)
    vcov[[i]] <- vcov(red)
    pert[i,] <- quantile(data$TmaxF_PopW, c(0:9/10, 1:99, 991:1000/10)/100,
                        na.rm = TRUE)
  }

  pmean <- as.data.frame(pert) %>% rownames_to_column(var = "fips_code") %>%
    select(-fips_code) %>% summarise_all(mean)

  mvall <- mvmeta(coef ~ avgtmean + rangetmean, vcov, method = "reml") # random-effects meta-regression

  blup <- blup(mvall,vcov=T)

```

```

bvar <- onebasis(unlist(pmean),fun="bs", degree=2,knots=pmean$50)

pmeanB <- pmean %>% select(p1:p99)
cpall <- crosspred(bvar, coef=coef(mvall), vcov=vcov(mvall),
  model.link = 'log',at=pmeanB)
pmin <- names(pmeanB[which.min((cpall$allfit))])

cpall <- crosspred(bvar, coef=coef(mvall), vcov=vcov(mvall),
  model.link = 'log', cen = pmeanB[pmin], at=pmean$95, ci.level=(1-0.05/44)) # correct for
  multiple comparisons

tab2[j,2] <- cpall$allRRfit
tab2[j,3] <- cpall$allRRlow
tab2[j,4] <- cpall$allRRhigh}

tab <- tab %>% as_tibble() %>% mutate(allRRfit=as.numeric(allRRfit),
  allRRlow=as.numeric(allRRlow),
  allRRhigh=as.numeric(allRRhigh)) %>%
mutate(sig=case_when(allRRlow>1|allRRhigh<1~'sig',TRUE~'not')) %>%
mutate(dis_fl=case_when(dis=='total'~'All-cause',
  dis=='symptom'~
  'Other signs and symptoms',
  dis=='suic_depress'~'Suicidality and depression',
  dis=='skin_soft'~'Skin and soft tissue infections',
  dis=='skin_soft_other'~'Other skin and soft tissue diseases',
  dis=='rd'~'Respiratory system diseases',
  dis=='otitis'~'Otitis media and externa',
  dis=='perinatal'~'Perinatal conditions',
  dis=='nervous'~'Nervous system diseases',
  dis=='muscul'~'Musculoskeletal system diseases',
  dis=='mental'~'Mental, behaviral and \neurodevelopmental disorders',
  dis=='injury'~'Injury and poisoning',
  dis=='infect_parasite'~'Infectious and parasitic diseases',
  dis=='heat_deplet'~'Heat related illness',
  dis=='genit'~'Genitourinary system diseases',
  dis=='external'~'External causes and other health factors',
  dis=='endo_nutri_metab'~'Endocrine, nutritional and metabolic diseases',
  dis=='digest'~'Digestive system diseases',
  dis=='cvd'~'Cardiovascular diseases',
  dis=='blood'~'Blood and immune system disorders',
  dis=='bact_ent'~'Bacterial enteritis',
  dis=='asthma'~'Asthma')) %>%
mutate(dis_fl = fct_reorder(dis_fl, desc(allRRfit)))

#### =====
# This is the sample R code to calculate AN/AF
#=====

avgtmean <- sapply(dlist, function(x) mean(x$TmaxF_PopW, na.rm = T))

```

```

rangetmean <- sapply(dlist, function(x) diff(range(x$TmaxF_PopW, na.rm = T)))
cities <- data.frame(city = hospital_number)
datanew <- data.frame(avgtmean = mean(tapply(avgtmean, cities$city, mean)),
                      rangetmean = mean(tapply(rangetmean, cities$city, mean)))
set.seed(12345678)
hospital_number <- as.character(unique(phis$Hospital_Number))
dlist <- lapply(hospital_number, function(x) phis[phis$Hospital_Number == x, ])
names(dlist) <- hospital_number
dis <- names(dlist[[1]])[5:26]

tab2b <- matrix(NA,22,7) # Create a matrix to store results
colnames(tab2b) <- c('dis', 'antot','antotlow','antothigh','aftot','aftotlow','aftothigh')
tab2b[1:22,1] <- dis
source("attrdl.R") # source the 'attrdl.R' function

for (j in seq_along(dis)) {
  totd <- rep(NA, length(hospital_number))
  names(totd) <- hospital_number

  # store results for point AN
  matsim <- matrix(NA, length(hospital_number), 1,
                  dimnames=list(hospital_number, c('total_heat')))

  nsim <- 5000 # define number of simulation

  # store results for simulated AN
  arraysim <- array(NA, dim = c(length(hospital_number), 1, nsim),
                   dimnames = list(hospital_number, c('total_heat')))

  # store coefficients and covariates
  coef <- matrix(NA, length(hospital_number), 1, dimnames = list(hospital_number))
  vcov <- vector("list", length(hospital_number))
  names(vcov) <- hospital_number
  pert <- matrix(NA, length(hospital_number), 119, # create a matrix to store temperature percentiles
                dimnames = list(hospital_number, c("min", paste0('p', 1:9/10), paste0('p', 1:99),
                paste0('p99.',1:9), "max"))))

  for (k in seq_along(hospital_number)) {
    data <- dlist[[k]] %>%
      mutate(dow = wday(Admit_Date), year = year(Admit_Date), ymonth = format(Admit_Date, "%Y-%m"))

    data$dos <- sequence(tapply(data$Admit_Date, data$year, length))

    # create the cross-basis term for temperature
    cb <- crossbasis(data$TmaxF_PopW, lag = 7, argvar = list(fun='bs', degree=2,
                  knots=median(data$TmaxF_PopW), arglag = list(knots = logknots(7, 2)), group = data$year)

    eval(parse(text=paste0("model <- glm(", dis[j], " ~ cb + factor(dow) +
      factor(holid) + ns(dos, 4) + ns(Admit_Date, 3/10) + ns(RHmax_PopW, 4),
      family = quasipoisson, data = data, na.action = 'na.exclude')"))))

```

```

red <- crossreduce(cb, model, cen = median(data$TmaxF_PopW))
coef[k, ] <- coef(red)
vcov[[k]] <- vcov(red)
pert[k, ] <- quantile(data$TmaxF_PopW, c(0:9/10, 1:99, 991:1000/10)/100,
                      na.rm = TRUE)
}
mvall <- mvmeta(coef ~ avgtmean + rangetmean, vcov, method = "reml") # random-effects meta-regression
blup <- blup(mvall, vcov=T) # blup

bvar <- onebasis(unlist(pmean),fun="bs", degree=2,knots=pmean$p50)

pmeanB <- pmean %>% select(p1:p99)
cpall <- crosspred(bvar, coef=coef(mvall), vcov=vcov(mvall),
                  model.link = 'log',at=pmeanB)
pmin <- names(pmeanB[which.min((cpall$allfit))])

#####
# RE-CENTERING

# GENERATE THE MATRIX FOR STORING THE RESULTS
minperchosp <- mintemphosp <- rep(NA,length(dlist))
names(mintemphosp) <- names(minperchosp) <- hospital_number

# DEFINE MINIMUM MORTALITY VALUES: EXCLUDE LOW AND VERY HOT TEMPERATURE
for(l in seq(length(dlist))) {
  data <- dlist[[l]]
  argvar=list(fun='bs',degree=2, knots=median(data$TmaxF_PopW,0.5))
  predvar <- quantile(data$TmaxF_PopW,1:99/100,na.rm=T)
  # REDEFINE THE FUNCTION USING ALL THE ARGUMENTS (BOUNDARY KNOTS INCLUDED)
  argvar <- list(x=predvar,fun='bs', degree=2,
                knots=quantile(data$TmaxF_PopW,0.5,na.rm=T),
                Bound=range(data$TmaxF_PopW,na.rm=T))
  bvar <- do.call(onebasis,argvar)
  minperchosp[l] <- (1:99)[which.min((bvar%*%blup[[l]]$blup))]
  mintemphosp[l] <- quantile(data$TmaxF_PopW,minperchosp[l]/100,na.rm=T)
  # print(minperchosp[l])
}

for (i in seq_along(hospital_number)) {
  cat(i, ")
  data <- dlist[[i]] %>%
  mutate(dow = wday(Admit_Date), year = year(Admit_Date), ymonth = format(Admit_Date, "%Y-%m"))

  data$dos <- sequence(tapply(data$Admit_Date, data$year, length))

  cb <- crossbasis(data$TmaxF_PopW, lag = 7, argvar = list(fun='bs', degree=2,
                knots=median(data$TmaxF_PopW), arglag = list(knots = logknots(7, 2)), group = data$year)

```

```

# for point AN
eval(parse(text=paste0("matsim[i,'total_heat'] <- attrdl(data$TmaxF_PopW, cb, data$, dis[j],
', coef=blup[[i]]$blup, vcov=blup[[i]]$vcov, type = "an", dir = "forw", cen= mintemphosp[i],
range = c(mintemphosp[i],2000))))))
# for simulated AN
eval(parse(text=paste0('arraysim[i,"total_heat",] <- attrdl(data$TmaxF_PopW,cb, data$, dis[j],
',coef=blup[[i]]$blup, vcov=blup[[i]]$vcov,type="an",dir="forw", cen= mintemphosp[i],
range = c(mintemphosp[i],2000),sim=T,nsim=nsim))))))
# total recorded ED visits
eval(parse(text=paste0('toted[i] <- sum(data$, dis[j],',na.rm = T))))))
}

# total AN
antot <- colSums(matsim)
antotlow <- apply(apply(arraysim,c(2,3),sum),1,quantile, 0.05/44) # correct for multiple comparisons
antothigh <- apply(apply(arraysim,c(2,3),sum),1,quantile,(1-0.05/44))
totedtot <- sum(toted) # sum of the observed ED visits

#=====
# ATTRIBUTABLE FRACTION
# TOTAL
aftot <- antot/totedtot*100
aftotlow <- antotlow/totedtot*100
aftothigh <- antothigh/totedtot*100

if(heat=='total_heat'){
  tab2b[j,2] <- antot[1]; tab2b[j,3] <- antotlow[1]; tab2b[j,4] <- antothigh[1]
  tab2b[j,5] <- aftot[1]; tab2b[j,6] <- aftotlow[1]; tab2b[j,7] <- aftothigh[1]
}
}

tab2b <- tab2b %>% as_tibble() %>%
mutate(antot=as.numeric(antot),antotlow=as.numeric(antotlow),antothigh=as.numeric(antothigh),
aftot=as.numeric(aftot),aftotlow=as.numeric(aftotlow),aftothigh=as.numeric(aftothigh)) %>%
mutate(dis_fl=case_when(dis=='total'~'All-cause',
dis=='symptom'~
'Other signs and symptoms',
dis=='suic_depress'~'Suicidality and depression',
dis=='skin_soft'~ 'Skin and soft tissue infections',
dis=='skin_soft_other'~'Other skin and soft tissue diseases',
dis=='rd'~'Respiratory system diseases',
dis=='otitis'~'Otitis media and externa',
dis=='perinatal'~'Perinatal conditions',
dis=='nervous'~'Nervous system diseases',
dis=='muscul'~'Musculoskeletal system diseases',
dis=='mental'~'Mental, behaviral and \nneurodevelopmental disorders',
dis=='injury'~'Injury and poisoning',
dis=='infect_parasite'~'Infectious and parasitic diseases',
dis=='heat_deplet'~'Heat related illness',

```

dis=='genit'~'Genitourinary system diseases',  
dis=='external'~'External causes and other health factors',  
dis=='endo\_nutri\_metab'~'Endocrine, nutritional and metabolic diseases',  
dis=='digest'~'Digestive system diseases',  
dis=='cvd'~'Cardiovascular diseases',  
dis=='blood'~'Blood and immune system disorders',  
dis=='bact\_ent'~'Bacterial enteritis',  
dis=='asthma'~'Asthma'))
